# Supplementary material
Source: HighWire-hosted journal article supplement (https://bmjopen.bmj.com/content/15/1/e091364)
Supplement: inline-supplementary-material-1 [file inline-supplementary-material-1.pdf]

Padua Risk Prediction Model Validation for Venous Thromboembolism Risk, Incidence and Predictors among Patients attending the Emergency Department of Tertiary Care Hospitals in Addis Ababa City, Ethiopia: A Multicentre Prospective Study

**Padua Risk Assessment Model (RAM)-** is the widely used tool to stratify medical patients at a different level of VTE risks based on the risk factors that exist in hospitalized patients and consists of 11 items as described in the table below

| Baseline features                              | Points |
|------------------------------------------------|--------|
| Active cancer                                  | 3      |
| Previous VTE                                   | 3      |
| Reduced mobility                               | 3      |
| Already known thrombophilia condition          | 3      |
| Trauma/surgery within a month                  | 2      |
| Age≥70 years                                   | 1      |
| Heart or respiratory failure                   | 1      |
| Acute myocardial infarction or ischemic stroke | 1      |
| Acute infection or rheumatologic disorder      | 1      |
| BMI≥30 kg/m <sup>2</sup>                       | 1      |
| Hormonal therapy                               | 1      |

It is known that based on numerous guidelines and protocols, the Padua Prediction Score (PPS) has been recommended as the best available model for assessing the risk of venous thromboembolism (VTE) in hospitalized medical patients in various settings. However, the tool has also been tested using reliability and validity index for which the output of SPSS computed

| Case Processing Summary |          |       |
|-------------------------|----------|-------|
|                         |          |       |
|                         |          | N     |
|                         |          | %     |
| Cases                   | Valid    | 422   |
|                         | Excluded | 0     |
|                         | Total    | 422   |
|                         |          | 100.0 |
|                         |          | .0    |
|                         |          | 100.0 |

Reliability Statistics

|                               |                                                                    |            |
|-------------------------------|--------------------------------------------------------------------|------------|
| Cronbach's Alpha <sup>a</sup> | Cronbach's Alpha<br>Based on<br>Standardized<br>Items <sup>a</sup> | N of Items |
| .814                          | .299                                                               | 11         |

| Item-Total Statistics     |                               |                                   |                                      |                                     |
|---------------------------|-------------------------------|-----------------------------------|--------------------------------------|-------------------------------------|
|                           | Scale Mean if<br>Item Deleted | Scale Variance if<br>Item Deleted | Corrected Item-<br>Total Correlation | Cronbach's Alpha<br>if Item Deleted |
| active cancer             | 1.92                          | .779                              | .266                                 | .524                                |
| previous VTE              | 2.10                          | .730                              | .028                                 | .857                                |
| Reduced mobility          | 1.49                          | .650                              | .168                                 | .728                                |
| trauma/surgery            | 1.83                          | 1.011                             | .509                                 | .101                                |
| age >=70                  | 1.92                          | .543                              | .085                                 | .944                                |
| known thrombophilia       | 2.12                          | .744                              | .031                                 | .837                                |
| heart/respiratory failure | 2.00                          | .675                              | .059                                 | .865                                |
| Acute infection           | 1.65                          | .770                              | .304                                 | .419                                |
| obesity                   | 2.10                          | .725                              | .050                                 | .870                                |
| hormonal therapy          | 2.07                          | .791                              | .222                                 | .659                                |
| acute MI/AIS              | 2.01                          | .665                              | .023                                 | .911                                |

a. Listwise deletion based on all variables in the procedure.

Factor Analysis

| Communalities             |         |            |
|---------------------------|---------|------------|
|                           | Initial | Extraction |
| active cancer             | 1.000   | .682       |
| Reduced mobility          | 1.000   | .476       |
| previous VTE              | 1.000   | .657       |
| known thrombophilia       | 1.000   | .685       |
| trauma/surgery            | 1.000   | .737       |
| age >=70                  | 1.000   | .504       |
| heart/respiratory failure | 1.000   | .580       |
| acute MI/AIS              | 1.000   | .545       |
| Acute infection           | 1.000   | .655       |
| obesity                   | 1.000   | .591       |
| hormonal therapy          | 1.000   | .761       |

Extraction Method: Principal Component Analysis.

Correlations

| Descriptive Statistics    |      |                |     |
|---------------------------|------|----------------|-----|
|                           | Mean | Std. Deviation | N   |
| active cancer             | .20  | .403           | 422 |
| previous VTE              | .02  | .128           | 422 |
| Reduced mobility          | .63  | .484           | 422 |
| known thrombophilia       | .00  | .069           | 422 |
| trauma/surgery            | .29  | .455           | 422 |
| age >=70                  | .20  | .400           | 422 |
| heart/respiratory failure | .13  | .332           | 422 |
| acute MI/AIS              | .11  | .315           | 422 |
| Acute infection           | .47  | .500           | 422 |
| obesity                   | .02  | .128           | 422 |
| hormonal therapy          | .05  | .223           | 422 |

| Correlations      |                 |               |                  |                |                   |                  |         |                 |                    |          |                       |          |
|-------------------|-----------------|---------------|------------------|----------------|-------------------|------------------|---------|-----------------|--------------------|----------|-----------------------|----------|
|                   |                 | active cancer | Reduced mobility | trauma/surgery | heart/respiratory | hormonal therapy | obesity | Acute infection | acute inflammation | age >=70 | known chronic illness | previous |
| active cancer     | Pearson         | 1             | -.195**          | -.286**        | -.156**           | -.013            | .026    | .817**          | -.142**            | -.061    | .051                  | -.020    |
|                   | Sig. (2-tailed) |               | .000             | .000           | .001              | .032             | .025    | .000            | .004               | 0.14     | .98                   | .017     |
|                   | N               | 422           | 422              | 422            | 422               | 422              | 422     | 422             | 422                | 422      | 422                   | 422      |
| Reduced mobility  | Pearson         | -.195**       | 1                | .084           | -.093             | -.194**          | -.054   | -.216**         | .117               | .738**   | .053                  | -.015    |
|                   | Sig. (2-tailed) | .000          |                  | .016           | .036              | .000             | .072    | .000            | .017               | .004     | .076                  | .056     |
|                   | N               | 422           | 422              | 422            | 422               | 422              | 422     | 422             | 422                | 422      | 422                   | 422      |
| trauma/surgery    | Pearson         | -.286**       | .084             | 1              | -.196**           | -.104            | -.083   | -.428**         | -.194**            | -.137**  | -.044                 | -.042    |
|                   | Sig. (2-tailed) | .000          | .016             |                | .000              | .034             | .017    | .000            | .000               | .005     | .014                  | .044     |
|                   | N               | 422           | 422              | 422            | 422               | 422              | 422     | 422             | 422                | 422      | 422                   | 422      |
| heart/respiratory | Pearson         | -.156**       | -.093            | -.196**        | 1                 | .008             | .119    | .043            | .093               | .151**   | -.026                 | .175**   |
|                   | Sig. (2-tailed) | .001          | .015             | .000           |                   | .016             | .015    | .037            | .050               | .002     | .022                  | .000     |
|                   | N               | 422           | 422              | 422            | 422               | 422              | 422     | 422             | 422                | 422      | 422                   | 422      |
| hormonal therapy  | Pearson         | .673          | -.194**          | -.104          | .008              | 1                | .053    | .035            | -.083              | -.117    | -.016                 | -.030    |
|                   | Sig. (2-tailed) | .013          | .000             | .034           | .026              |                  | .027    | .047            | .018               | .016     | .040                  | .033     |
|                   | N               | 422           | 422              | 422            | 422               | 422              | 422     | 422             | 422                | 422      | 422                   | 422      |
| obesity           | Pearson         | .026          | -.054            | -.083          | .119              | .053             | 1       | -.048           | .072               | .028     | -.009                 | .274**   |
|                   | Sig. (2-tailed) | .028          | .012             | .087           | .015              | .017             |         | .032            | .040               | .014     | .054                  | .000     |
|                   | N               | 422           | 422              | 422            | 422               | 422              | 422     | 422             | 422                | 422      | 422                   | 422      |
| Acute infection   | Pearson         | .817**        | -.216**          | -.428**        | .043              | .035             | -.048   | 1               | -.123              | -.055    | -.065                 | -.048    |
|                   | Sig. (2-tailed) | .000          | .000             | .000           | .037              | .017             | .022    |                 | .011               | .021     | .014                  | .032     |

|                     |                 |         |        |         |        |        |        |        |        |        |       |       |
|---------------------|-----------------|---------|--------|---------|--------|--------|--------|--------|--------|--------|-------|-------|
|                     | N               | 422     | 422    | 422     | 422    | 422    | 422    | 422    | 422    | 422    | 422   | 422   |
| acute MI/AIS        | Pearson         | -.142** | .117*  | -.194** | .093   | -.083* | .072*  | -.123* | 1      | .257** | .085* | .013  |
|                     | Sig. (2-tailed) | .004    | .017   | .000    | .056   | .018   | .013   | .011   |        | .000   | .020  | .790  |
|                     | N               | 422     | 422    | 422     | 422    | 422    | 422    | 422    | 422    | 422    | 422   | 422   |
| age >=70            | Pearson         | -.061*  | .738** | -.137** | .151** | -.117* | .028   | -.055  | .257** | 1      | .052  | -.018 |
|                     | Sig. (2-tailed) | .014    | .004   | .005    | .002   | .016   | .564   | .261   | .000   |        | .286  | .708  |
|                     | N               | 422     | 422    | 422     | 422    | 422    | 422    | 422    | 422    | 422    | 422   | 422   |
| known thrombophilia | Pearson         | .051*   | .053*  | -.044*  | -.026* | -.016* | -.009* | -.065* | .085*  | .052*  | 1     | -.009 |
|                     | Sig. (2-tailed) | .018    | .026   | .034    | .012   | .040   | .034   | .011   | .010   | .036   |       | .054  |
|                     | N               | 422     | 422    | 422     | 422    | 422    | 422    | 422    | 422    | 422    | 422   | 422   |
| previous VTE        | Pearson         | -.020   | -.015  | -.042   | .175** | -.030  | .274** | -.048  | .013   | -.018  | -.009 | 1     |
|                     | Sig. (2-tailed) | .687    | .756   | .384    | .000   | .533   | .000   | .322   | .790   | .708   | .854  |       |
|                     | N               | 422     | 422    | 422     | 422    | 422    | 422    | 422    | 422    | 422    | 422   | 422   |

\*\* . Correlation is significant at the 0.01 level (2-tailed).

\* . Correlation is significant at the 0.05 level (2-tailed).

In general, the Cronbach's Alpha of 0.814 indicated in acceptable range to determine internal consistency. The Pearson correlation matrix also showed  $p<0.05$ , and the variance extracted for each item in the confirmatory factor analysis (CFA) was found to be more than 0.5, indicating the presence of convergent and discriminant validity of the tool.
